# Supplementary material
Source: PubMed Central journal article supplement (PMC4525175)
Supplement: ncomms8870-s1.pdf [file ncomms8870-s1.pdf]

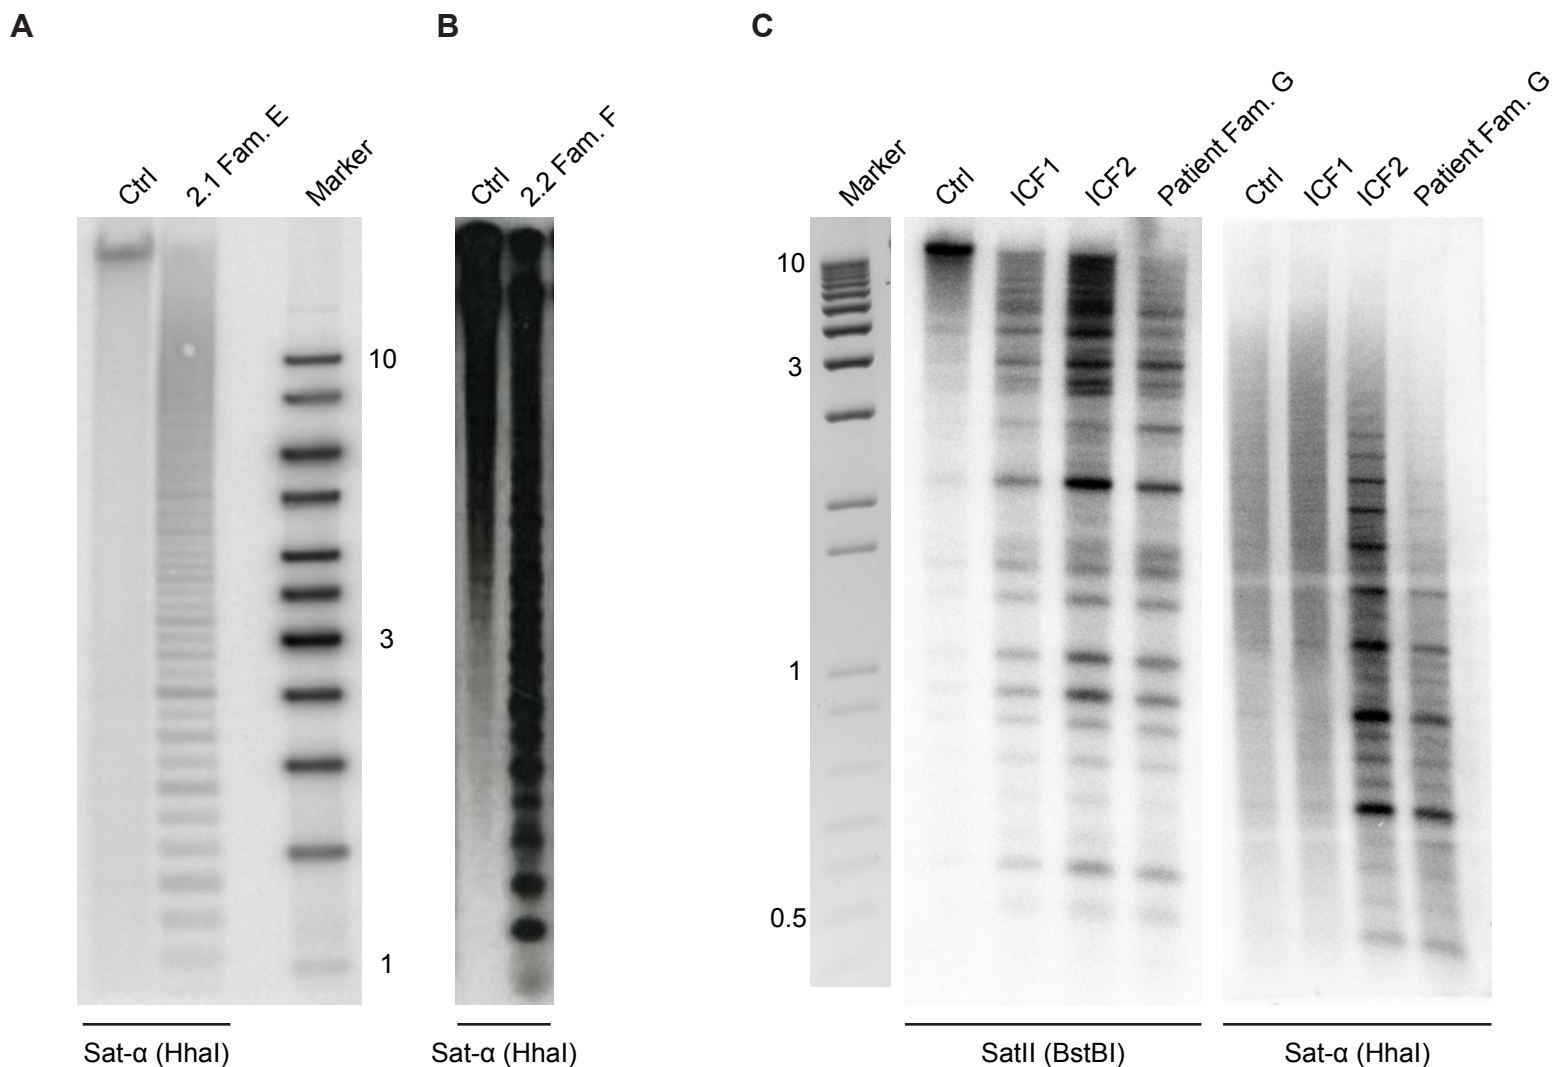

**Supplementary Figure 1: Repeat hypomethylation in ICF patients from families E, F and G**  
**(a, b)** Sat- $\alpha$  methylation analysis using HhaI digestion followed by Southern blot analysis of healthy controls and patients 2.1 from family E and 2.2 from family F showed hypomethylation in the patient derived samples. **(c)** SatII (BstBI) and Sat- $\alpha$  (HhaI) methylation analysis by Southern blot analysis in DNA derived from a healthy control, an ICF1 patient, an ICF2 patient and the patient from family G confirmed SatII hypomethylation in all ICF samples and Sat- $\alpha$  hypomethylation in ICF2 and ICFX samples. Molecular weights of the DNA size markers are in kilo-basepairs.

|        |     |                                                                                                       |     |
|--------|-----|-------------------------------------------------------------------------------------------------------|-----|
| CDCA7  | 261 | YNRSLGSTCHQCRQKTIDTKTNCRNPDWGVRRGQFCGPCLRNRYGEEVRDALLDPNWHCPPCRGICNCSFCRQRDGRCATGVLVYLAKEYHGFGNVHAYLK | 361 |
|        |     | Y++ LG+TCHQCRQKTIDTKT CRN C GVRGQFCGPCLRNRYGE+VR ALLDP+W CPPCRGICNCS+CR+RDGRCATG+L++LAK++G+ NV YL+    |     |
| CDCA7L | 345 | YDKVLGNTCHQCRQKTIDTKTVCRNQGCGVRRGQFCGPCLRNRYGEDVRSALLDPDWVCPPCRGINCSYCRKRDGRCATGILIHAKFYGYDNVKEYLE    | 444 |

### Supplementary figure 2: Alignment of the 4-CXXC domains of CDCA7 and CDCA7L

Alignment using blastp (NCBI) showed 76% sequence identity between the 4-CXXC domain of CDCA7 with that of CDCA7L. Identified mutations are highlighted in red.

**a**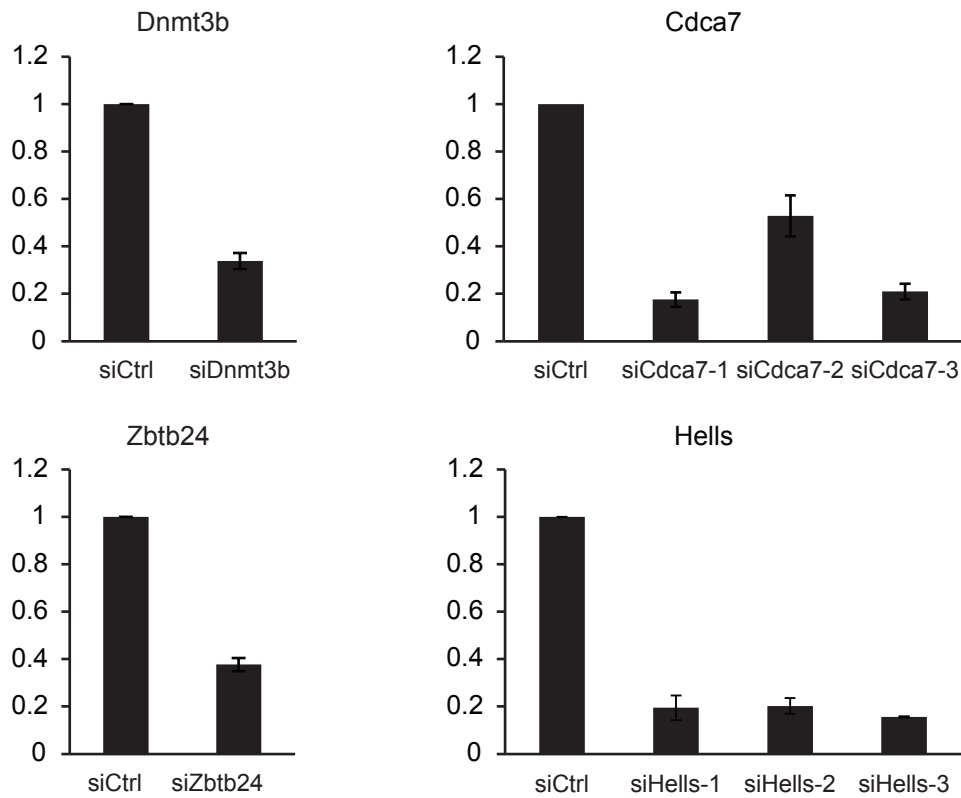**b**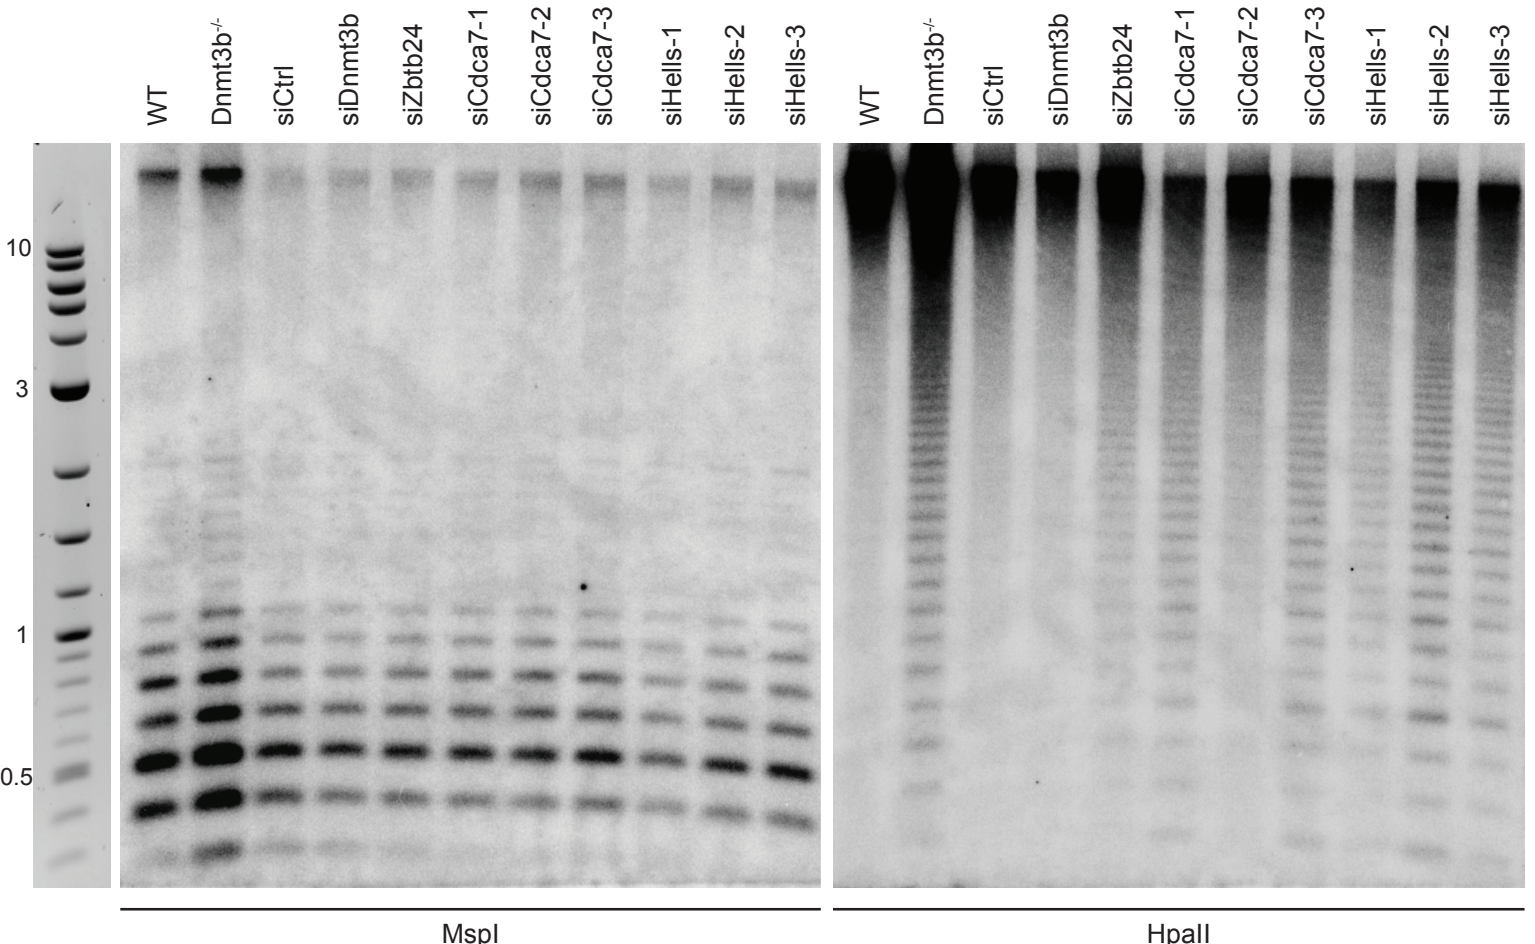

**Supplementary figure 3: confirmation of minor satellite hypomethylation through siRNA mediated knockdown in wildtype MEFs (a)** qRT-PCR quantification of mRNA expression of the indicated transcript upon knockdown using the indicated siRNAs, siCtrl levels are set to 1, error bars indicate SEM of average knockdown levels of at least two independent experiments. **(b)** Replication and extension of the data in figure 2g showing minor satellite DNA hypomethylation in wild type MEFs upon knockout of Dnmt3b and knockdown of Zbtb24, Cdca7 and Hells with different siRNA's. Molecular weights of the 2-Log DNA size marker are in kilo-basepairs.

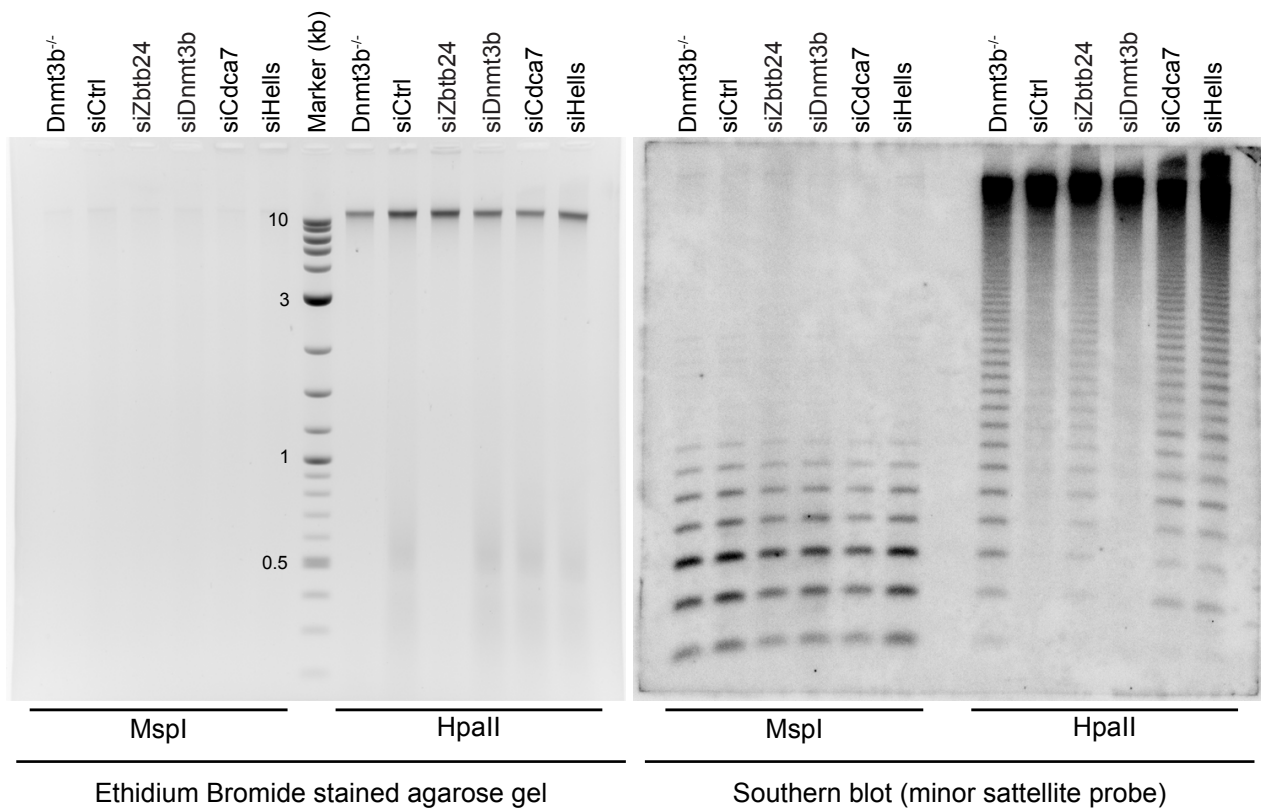

**Supplementary Figure 4: Uncropped images of agarose gels and Southern blots**

Uncropped images corresponding to Figure 2g. Left panel: ethidium bromide stained agarose gel, right panel: Southern blot probed for minor satellites. Molecular weights of the 2-Log DNA size marker are in kilo-basepairs.

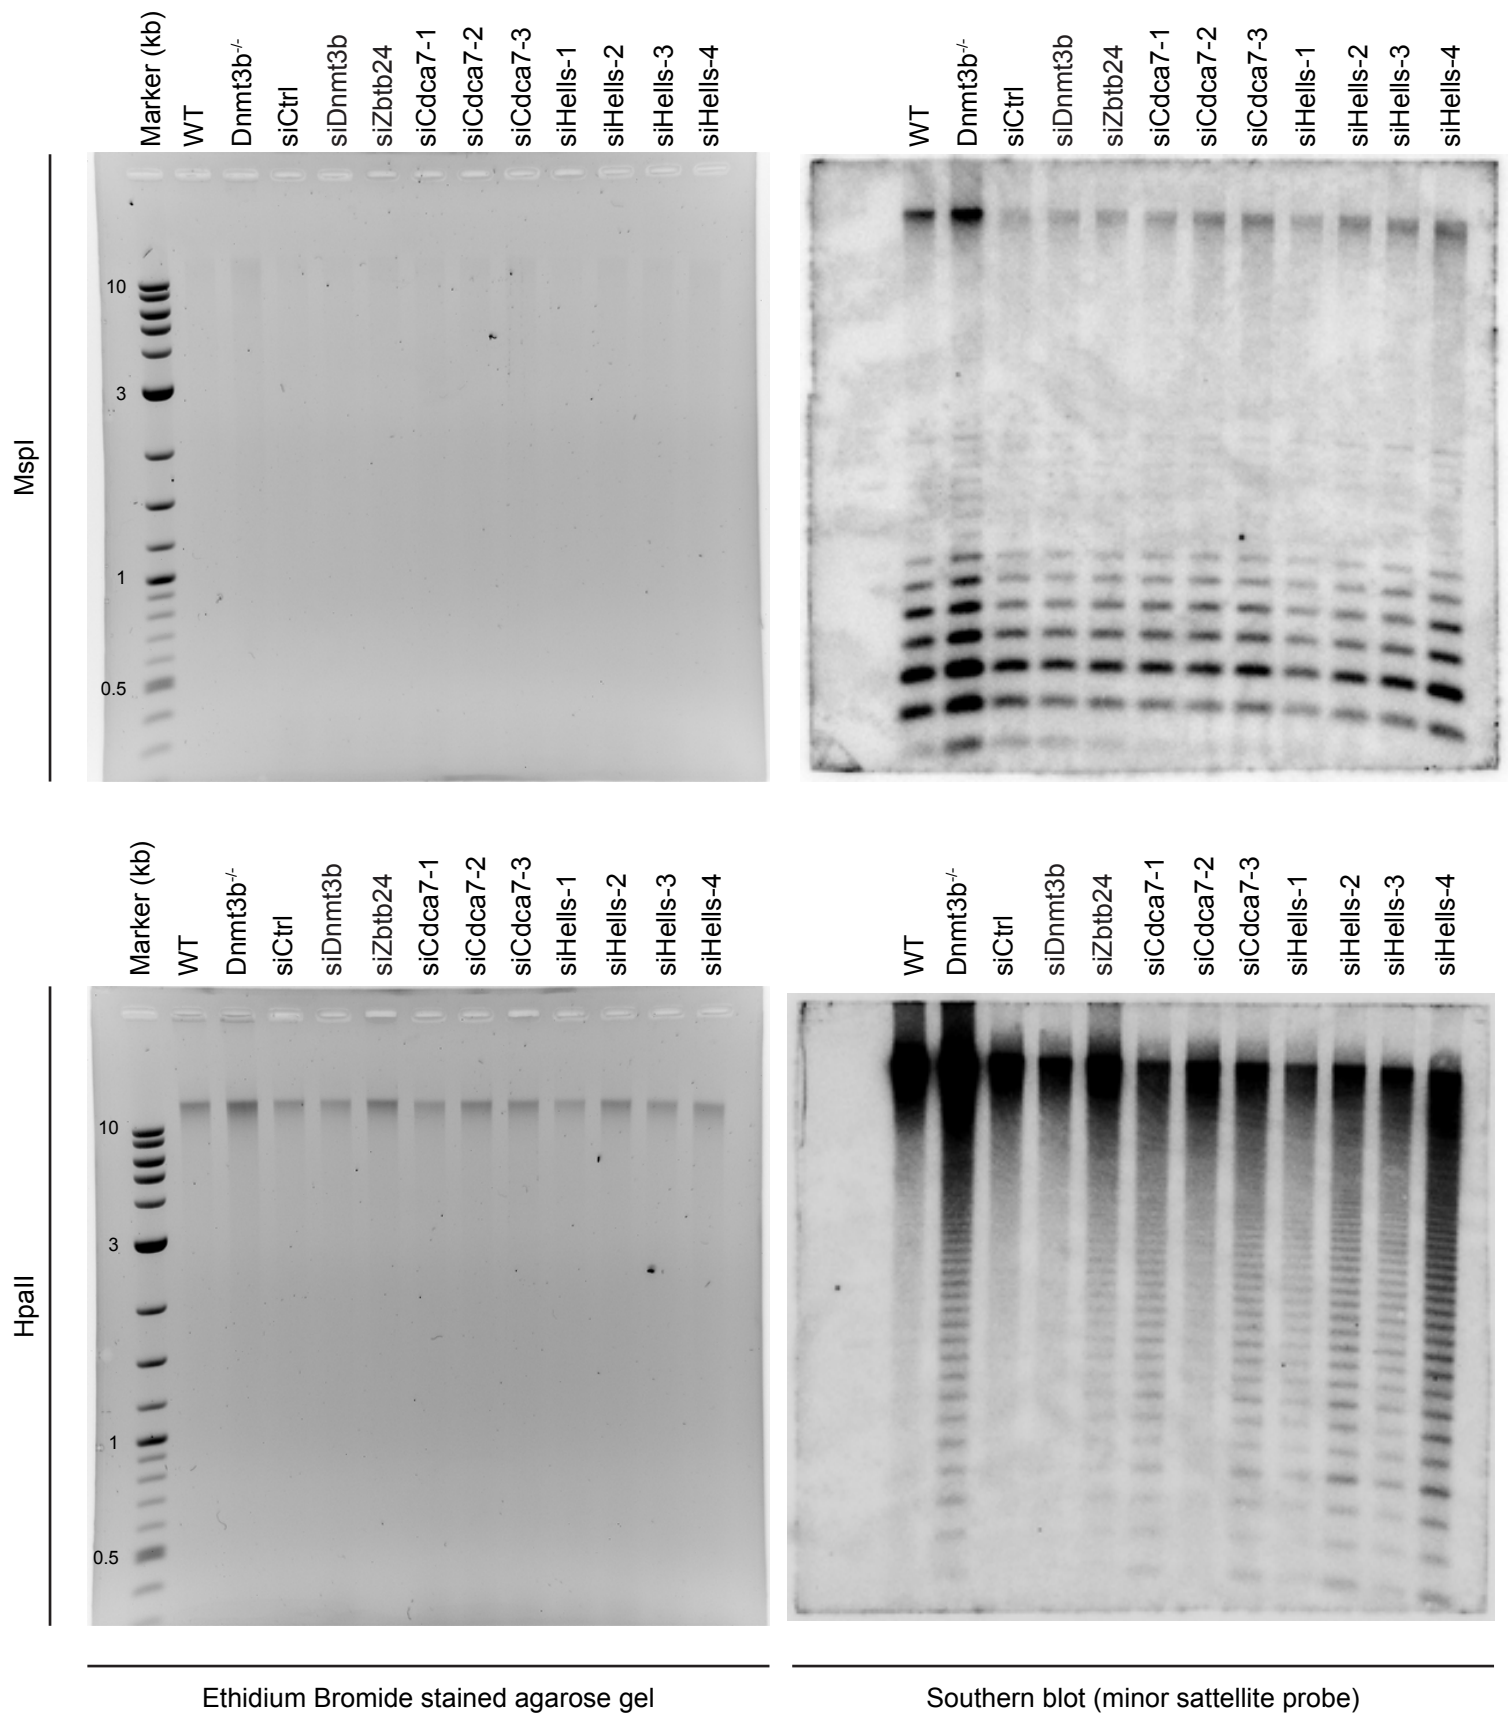

**Supplementary Figure 5: Uncropped images of agarose gels and Southern blots**

Uncropped images corresponding to Supplementary Figure 3b. Left panels: ethidium bromide stained agarose gels, right panels: Southern blots probed for minor satellites. Upper panels: MspI digestion, lower panels: HpaII digestion. Molecular weights of the 2-Log DNA size marker are in kilo-basepairs.

Supplementary Table 1: demographic and clinical characteristics of patients

| ICF type                                     | ICF3                                       | ICF3                                                                                 | ICF3                                             | ICF3                                     | ICF3                 | ICF4                                           | ICF4                         | ICF4                                                                                 | ICF4                        | ICF4         | ICF1                                                 | ICF2                                              |
|----------------------------------------------|--------------------------------------------|--------------------------------------------------------------------------------------|--------------------------------------------------|------------------------------------------|----------------------|------------------------------------------------|------------------------------|--------------------------------------------------------------------------------------|-----------------------------|--------------|------------------------------------------------------|---------------------------------------------------|
| Family (individual)                          | A                                          | B                                                                                    | C                                                | D (2.2)                                  | D (2.3)              | E (2.1)                                        | E (2.2)                      | F                                                                                    | G                           | H            | n=23                                                 | n=13                                              |
| Gene defect                                  | CDCA7                                      | CDCA7                                                                                | CDCA7                                            | CDCA7                                    | CDCA7                | HELLS                                          | HELLS                        | HELLS                                                                                | HELLS                       | HELLS        | DNMT3B                                               | ZBTB24                                            |
| Mutation Paternal allele                     | c.820C>T                                   | c.881G>T                                                                             | c.911G>A                                         | c.821G>A                                 | c.821G>A             | c.2096A>G                                      | c.2096A>G                    | c.2283_2286delGTCT                                                                   | c.2400_2402delGTT           | c.610A>T     |                                                      |                                                   |
|                                              | p.(Arg274Cys)                              | p.(Gly294Val)                                                                        | p.(Arg304His)                                    | p.Arg274His                              | p.Arg274His          | p.Gln699Arg                                    | p.Gln699Arg                  | p.(Ser762Argfs*4)                                                                    | p.(Leu801del)               | p.(Lys204*)  |                                                      |                                                   |
| ExAC allele frequency                        | 0                                          | 0                                                                                    | 8.24E-06                                         | 8.24E-06                                 | 8.24E-06             | 0                                              | 0                            | 0                                                                                    | 8.26E-06                    | 0            |                                                      |                                                   |
| Provean score                                | -7.306                                     | -8.219                                                                               | -4.566                                           | -4.566                                   | -4.566               | -3.825                                         | -3.825                       | N/A                                                                                  | -9.303                      | N/A          |                                                      |                                                   |
| PolyPhen-2 score                             | prob. damag.                               | prob. damag.                                                                         | prob. damag.                                     | prob. damag.                             | prob. damag.         | prob. damag.                                   | prob. damag.                 | N/A                                                                                  | N/A                         | N/A          |                                                      |                                                   |
| Mutation Maternal allele                     | c.820C>T                                   | c.881G>T                                                                             | c.911G>A                                         | c.821G>A                                 | c.821G>A             | c.370+2T>A                                     | c.370+2T>A                   | c.2283_2286delGTCT                                                                   | c.2400_2402delGTT           | c.374_381dup |                                                      |                                                   |
|                                              | p.(Arg274Cys)                              | p.(Gly294Val)                                                                        | p.(Arg304His)                                    | p.Arg274His                              | p.Arg274His          | skip ex5                                       | skip ex5                     | p.(Ser762Argfs*4)                                                                    | p.(Leu801del)               | (p.Lys128*)  |                                                      |                                                   |
| ExAC allele frequency                        | 0                                          | 0                                                                                    | 8.24E-06                                         | 8.24E-06                                 | 8.24E-06             | 0                                              | 0                            | 0                                                                                    | 8.26E-06                    | 0            |                                                      |                                                   |
| Provean score #                              | -7.306                                     | -8.219                                                                               | -4.566                                           | -4.566                                   | -4.566               | N/A                                            | N/A                          | N/A                                                                                  | -9.303                      | N/A          |                                                      |                                                   |
| PolyPhen-2 score *                           | prob. damag.                               | prob. damag.                                                                         | prob. damag.                                     | prob. damag.                             | prob. damag.         | N/A                                            | N/A                          | N/A                                                                                  | N/A                         | N/A          |                                                      |                                                   |
| Sex                                          | M                                          | F                                                                                    | F                                                | M                                        | F                    | F                                              | M                            | F                                                                                    | M                           | F            |                                                      |                                                   |
| Birth year                                   | 1982                                       | 1998                                                                                 | 1978                                             | 2005                                     | 2012                 | 2000                                           | 2007                         | 2002                                                                                 | 1999                        | 2010         |                                                      |                                                   |
| Deceased (age in yrs)                        | yes (26)                                   |                                                                                      |                                                  |                                          |                      |                                                |                              | yes (1.2)                                                                            |                             |              |                                                      |                                                   |
| Consanguineous (reported)                    | yes                                        | suspected                                                                            | yes                                              | yes                                      | yes                  | no                                             | no                           | unknown                                                                              | yes                         | unknown      |                                                      |                                                   |
| Origin                                       | Turkish                                    | French                                                                               | French                                           | Turkish                                  | Turkish              | English                                        | English                      | Japanese                                                                             | French                      | Italian      |                                                      |                                                   |
| Birth weight (grams)                         | 1960                                       | 730                                                                                  | 1820                                             | 2800                                     | 2250                 | 2400                                           | 3100                         | 1770                                                                                 | 3830                        | 900          | <p3 (3/20) ‡                                         | <p3 (1/7) ‡                                       |
| Motor developmental delay                    | yes                                        | yes                                                                                  | no                                               | no                                       | no                   | no                                             | yes                          |                                                                                      | yes                         | yes          | 9/16                                                 | 7/8                                               |
| Mental retardation                           | yes                                        | yes                                                                                  | no                                               | no                                       | no                   | yes (mild)                                     | no                           |                                                                                      | yes                         | yes          | 9/20                                                 | 13/13                                             |
| Facial anomalies                             | yes                                        | yes                                                                                  | no                                               | yes                                      | yes                  | yes                                            | yes                          | yes                                                                                  | yes                         | yes          | 21/22                                                | 13/13                                             |
| Gastrointestinal problems                    | yes                                        | yes                                                                                  | yes                                              | no                                       | yes                  | yes                                            | no                           | no                                                                                   | no                          | no           | 7/14                                                 | 2/6                                               |
| Infections                                   | otitis<br>pneumonia                        | otitis<br>pneumonia<br>myocarditis<br>peritonitis                                    | otitis<br>pneumonia<br>mastoiditis<br>meningitis | otitis                                   | pneumonia<br>Candida | pneumonia<br>Pneumocystis                      |                              |                                                                                      | otitis<br>pneumonia         | bronchitis   | 8/13<br>16/16<br>Pneumocystis (n=2)<br>Candida (n=4) | 2/6<br>5/7<br>Pneumocystis (n=2)<br>Candida (n=2) |
| Cytogenetic abnormalities<br>Chr 1, 9 and 16 | Stretching<br>Multiradial<br>configuration | Stretching<br>Associations<br>Rosettes<br>Branching<br>Micronuclei<br>Decondensation | Stretching                                       | Stretching<br>Breaking<br>Decondensation |                      | Isochromosomes<br>Multiradial<br>configuration |                              | Stretching<br>Associations<br>Rosettes<br>Branching<br>Micronuclei<br>Decondensation | Translocations<br>Deletions | Rosettes     |                                                      |                                                   |
| α-satellite hypomethylation                  | N/A                                        | Yes (ref. 13)                                                                        | Yes (ref. 13)                                    | Yes (ref. 7)                             | N/A                  | Yes (this study)                               | N/A                          | Yes (this study)                                                                     | Yes (this study)            | N/A          | No                                                   | Yes                                               |
| Treatment                                    |                                            |                                                                                      |                                                  |                                          |                      | stem cell<br>transplantation                   | stem cell<br>transplantation |                                                                                      |                             |              |                                                      |                                                   |
| IgG (g/l)                                    | 2.8                                        | 0.31                                                                                 | 2                                                | 2.32                                     | 1.11                 | < 0.33                                         | 8.05 (maternal)              | 0.23                                                                                 | 0.91                        | IVIG         |                                                      |                                                   |
| IgA (g/l)                                    | < 0.04                                     | 0.05                                                                                 | 0.27                                             | < 0.07                                   | 0.06                 | < 0.07                                         | < 0.3                        | 0.06                                                                                 | < 0.04                      | < 0.04       |                                                      |                                                   |
| IgM (g/l)                                    | 0.23                                       | < 0.06                                                                               | 0.25                                             | 0.03                                     | 0.04                 | 0.10                                           | < 0.22                       | 0.05                                                                                 | 0.04                        | < 0.04       |                                                      |                                                   |

#: Protein Variation Effect Analyzer (provean.jcvi.org/)

\*: Polymorphism Phenotyping v2 (genetics.bwh.harvard.edu/pph2/)

‡: Birthweight less than the third percentile for gestational age

Supplementary table 2: List of primers and siRNAs

**List of primers:**

| <b>human exons:</b> | <b>Fw primer:</b>          | <b>Rev primer:</b>          | <b>Mutation:</b>                        |
|---------------------|----------------------------|-----------------------------|-----------------------------------------|
| CDCA7 exon 8        | GGACATTCTGTAAATATGCCATTTTC | TCCACCCCTTCACCAATG          | c.820C>T; c.821G>A                      |
| CDCA7 exon 8        | GCAAGCCATTGTGATTGGTT       | CATGTGGCTGAATGAATTGC        | c.881G>T; c.911G>A                      |
| HELLS exon 5-6      | GGCTCAATTGCAGGAAACAT       | TTAAAACCTACATTTTACTCAACATCA | c.370+2T>A<br>c.374_381dup              |
| HELLS exon 8        | GCTTCCCAAAGTGCTGTGAT       | GCCATAAAAGTGCTGGAAAGC       | c.610A>T                                |
| HELLS exon 20       | CCTGGCTAGATCATTGATGTTG     | ACTCGGCCCCAGGCTGTAATA       | c.2096A>G                               |
| HELLS exon 21-22    | CCGTCTTCTTAATGCAAGC        | CATGTGGCTGAATGAATTGC        | c.2283_2286delGTCT<br>c.2400_2402delGTT |

| <b>Human transcripts:</b> | <b>Fw primer:</b>    | <b>Rev primer:</b>       |
|---------------------------|----------------------|--------------------------|
| HELLS ex3-5               | TGACGAAAATGGAACAGCAA | CTCTTTTGACATGACCTCTGAAAT |

| <b>Murine transcripts:</b> | <b>Fw primer:</b>      | <b>Rev primer:</b>         |
|----------------------------|------------------------|----------------------------|
| Dnmt3b                     | CGCCACCATGTGCAGGAGTAC  | GACGCTCTTAGGTGTCACCTTCTTCC |
| Zbtb24                     | GCTGGAGCACATGAGCCTG    | TTGGCACTGGAGTCAGAGAAG      |
| Cdca7                      | GACAGCTACATGAACGACGATG | GATGACATGTAGAACCCAGAGAG    |
| Hells                      | ACACGAGCTGGTGGTTTAGG   | GCCTGGAGATCAGACTGAGG       |

**List of siRNA's**

| <b>Target gene:</b> | <b>siRNA sequence (5' -&gt; 3')</b> |
|---------------------|-------------------------------------|
| Dnmt3b              | GGCUGUUCAGCCAGCACUUUAAU             |
| Zbtb24              | GAAGCCAUUUACUUGUGAA                 |
| Cdca7-1             | AUGACAGUUGUGACAGCUUU                |
| Cdca7-2             | CCUCUUACCAGGUCAAGGU                 |
| Cdca7-3             | AGGAGGAAGAGGAUAAGUA                 |
| Hells-1             | GAGAAGUUGAUAAUCCAUA                 |
| Hells-2             | GUCUACACUCCUAACUGG                  |
| Hells-3             | GUCUGAUGUUGCUCUUGAA                 |
